# Supplementary material for: Synthesis of Upconversion β-NaYF4:Nd3+/Yb3+/Er3+ Particles with Enhanced Luminescent Intensity through Control of Morphology and Phase
Source: PubMed Central journal article supplement (PMC5312859; doi:10.3390/nano5010218), 2015-02-24
Supplement: nanomaterials-05-00218-s001.pdf [file nanomaterials-05-00218-s001.pdf]

# Supplementary Information

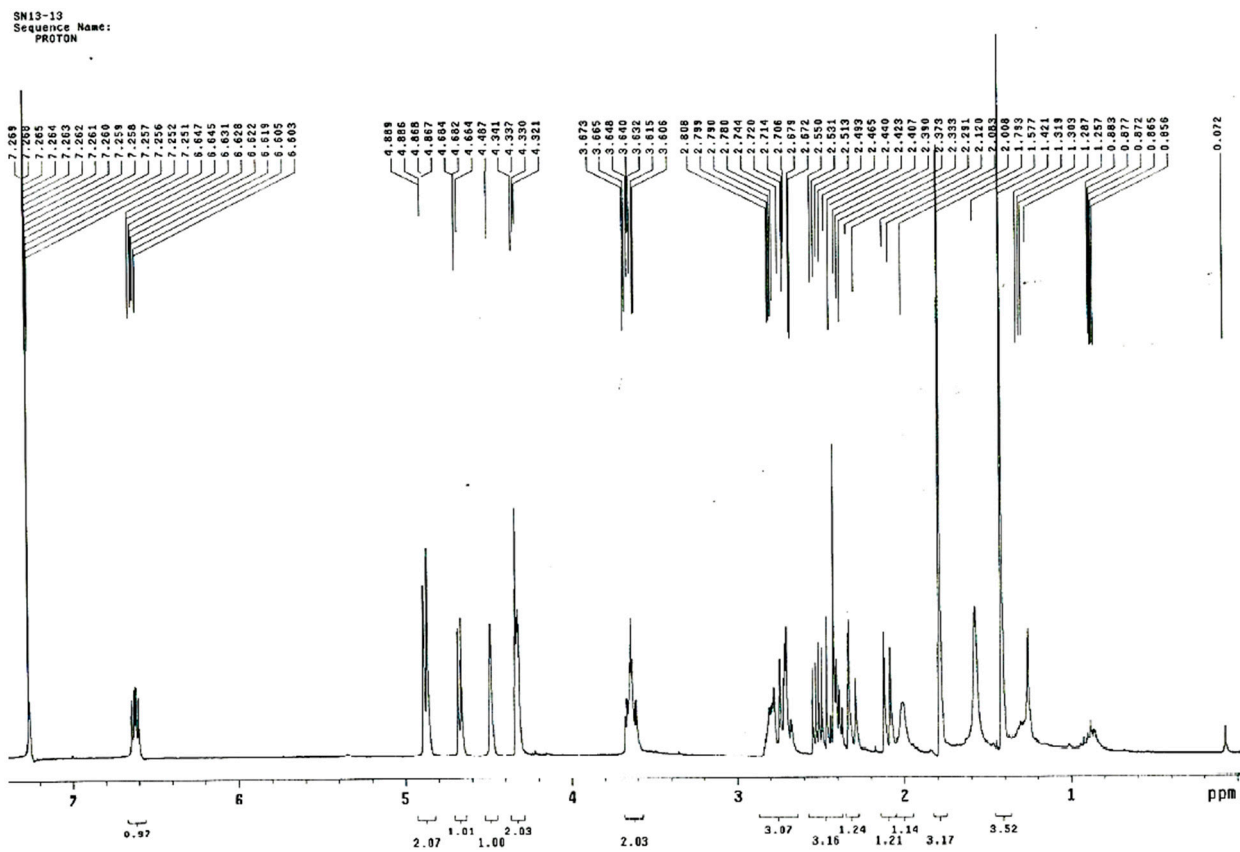

Figure S1.  $^1\text{H}$  NMR spectrum (400 MHz) of compound **2** in  $\text{CDCl}_3$ .

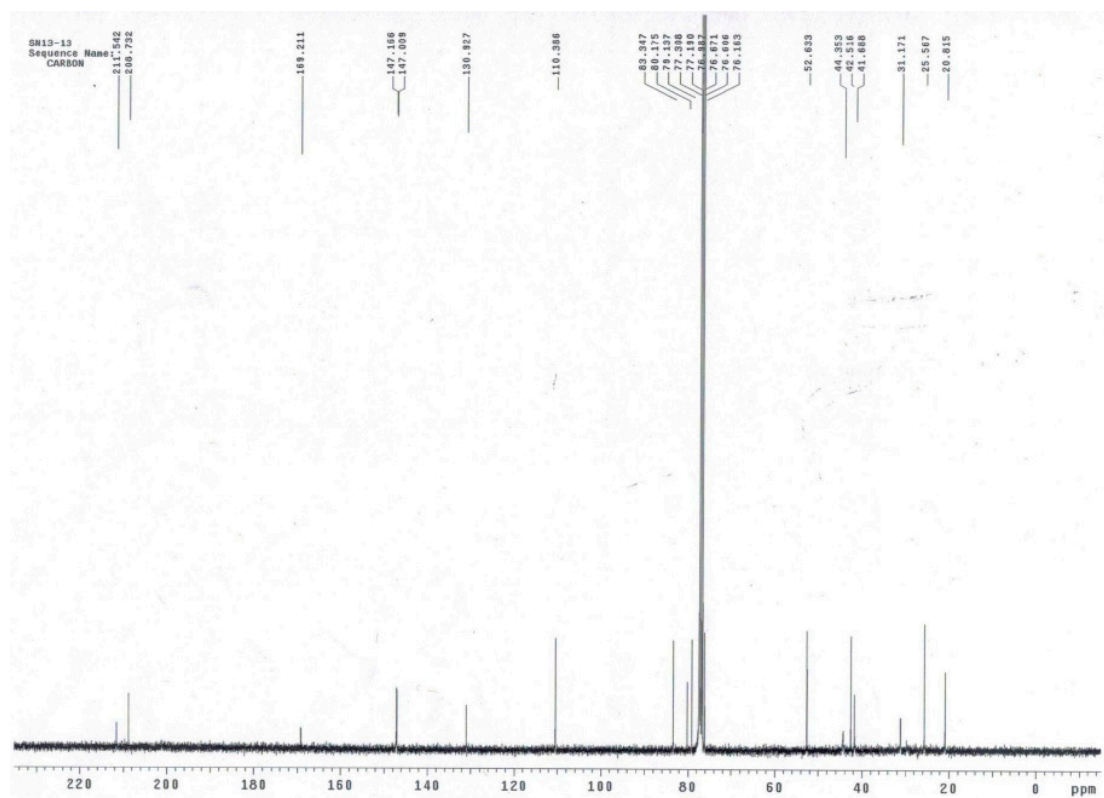

Figure S2.  $^{13}\text{C}$  NMR spectrum (100 MHz) of compound **2** in  $\text{CDCl}_3$ .

SN13-13  
Sequence Name:  
gHSQC  
Temp. 25.0 C / 298.1 K  
Operator: chen-ting  
Relax. delay 1.000 sec  
Acq. time 0.150 sec  
Width 6406.1 Hz  
2D Width 17116.0 Hz  
64 repetitions  
2 x 128 increments  
OBSERVE H1, 400.4177120 MHz  
DECOUPLE C13, 100.6326652 MHz  
Power 51 dB  
on during acquisition  
off during delay  
GARP-1 modulated  
DATA PROCESSING  
Gauss apodization 0.069 sec  
F1 DATA PROCESSING  
Gauss apodization 0.007 sec  
FT size 2048 x 2048  
Total time 5 hr, 59 min

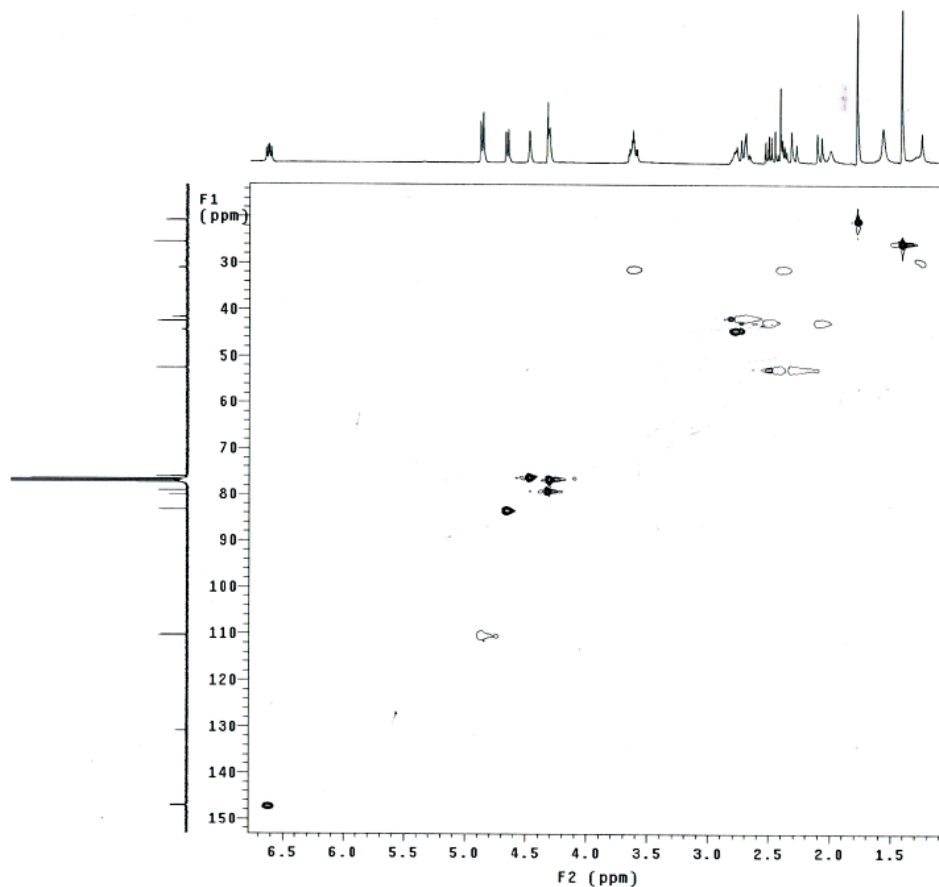

Figure S3. gHSQC spectrum (400 MHz) of compound **2** in CDCl<sub>3</sub>.

SN13-13  
Sequence Name:  
gHMBC  
Temp. 25.0 C / 298.1 K  
Operator: chen-ting  
Relax. delay 1.000 sec  
Acq. time 0.128 sec  
Width 6406.1 Hz  
2D Width 24161.9 Hz  
64 repetitions  
400 increments  
OBSERVE H1, 400.4177120 MHz  
DATA PROCESSING  
Sq. sine bell 0.064 sec  
F1 DATA PROCESSING  
Sq. sine bell 0.017 sec  
FT size 2048 x 4096  
Total time 9 hr, 1 min

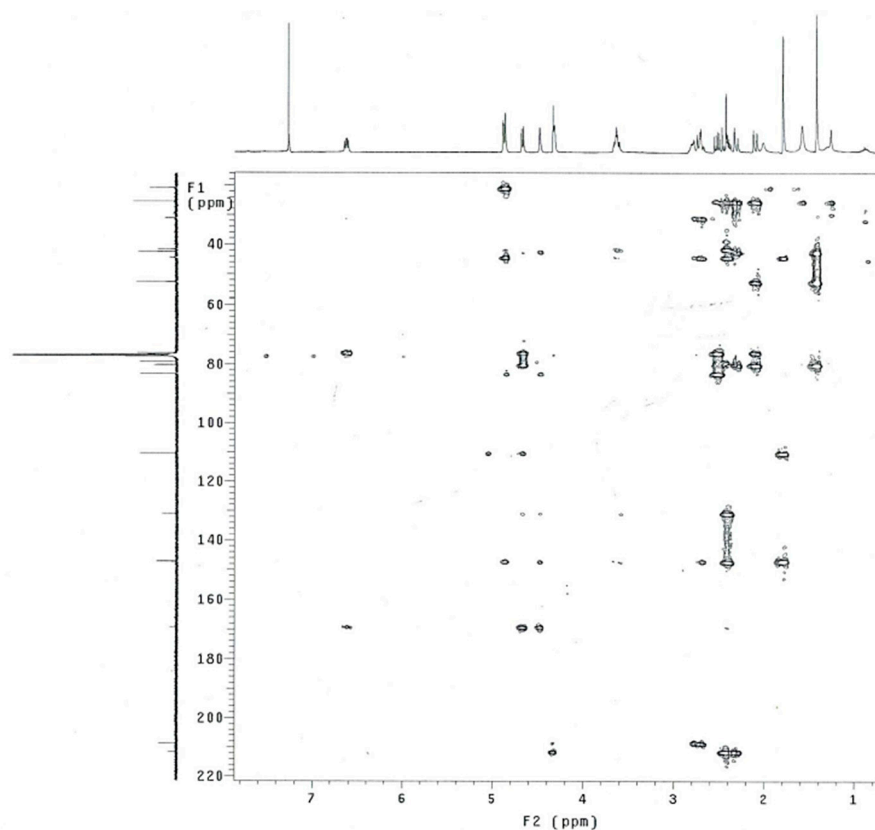

Figure S4. gHMBC spectrum (400 MHz) of compound **2** in CDCl<sub>3</sub>.

SN13-13  
Sequence Name:  
gCOSY  
Temp. 25.0 C / 298.1 K  
Operator: chen-ting  
Relax. delay 1.000 sec  
Acq. time 0.150 sec  
Width 3852.6 Hz  
2D Width 3852.6 Hz  
64 Repetitions  
128 Increments  
OBSERVE H1, 400.4177120 MHz  
DATA PROCESSING  
Sq. sine bell 0.075 sec  
F1 DATA PROCESSING  
Sq. sine bell 0.033 sec  
F1 size 2048 x 2048  
Total time 2 hr, 59 min

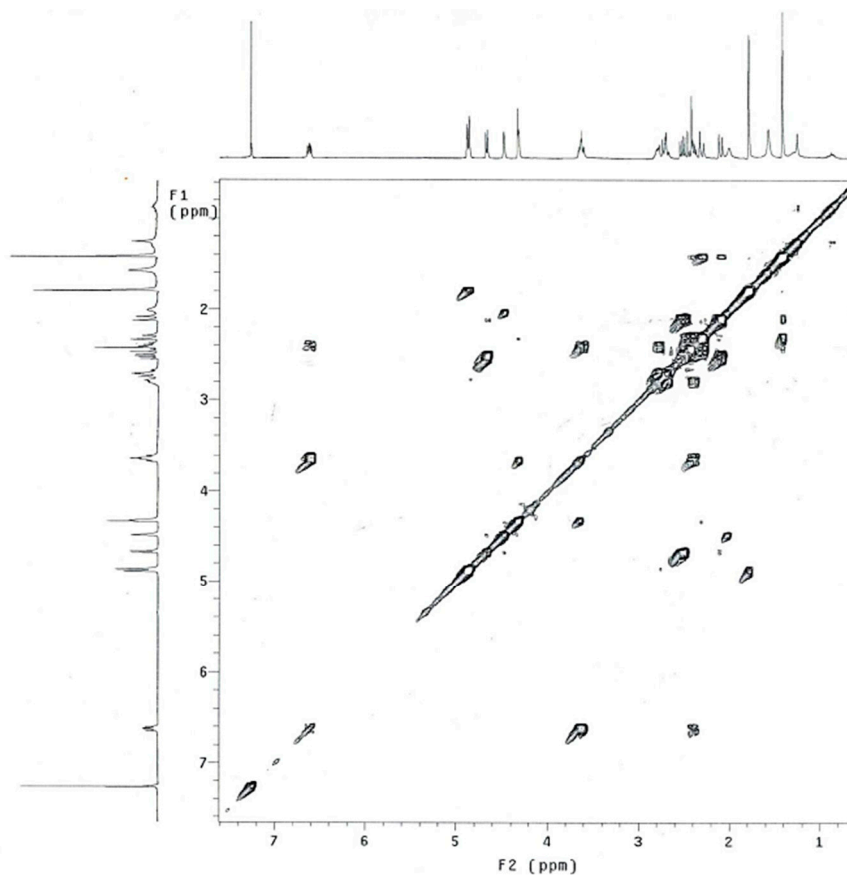

Figure S5. COSY spectrum (400 MHz) of compound **2** in CDCl<sub>3</sub>.

SN13-13  
Sequence Name:  
NOESY  
Temp. 25.0 C / 298.1 K  
Operator: chen-ting  
Relax. delay 1.000 sec  
Acq. time 0.150 sec  
Width 3852.6 Hz  
2D Width 3852.6 Hz  
64 Repetitions  
2 x 250 Increments  
OBSERVE H1, 400.4177120 MHz  
DATA PROCESSING  
Gauss apodization 0.069 sec  
F1 DATA PROCESSING  
Gauss apodization 0.047 sec  
F1 size 2048 x 2048  
Total time 14 hr, 54 min

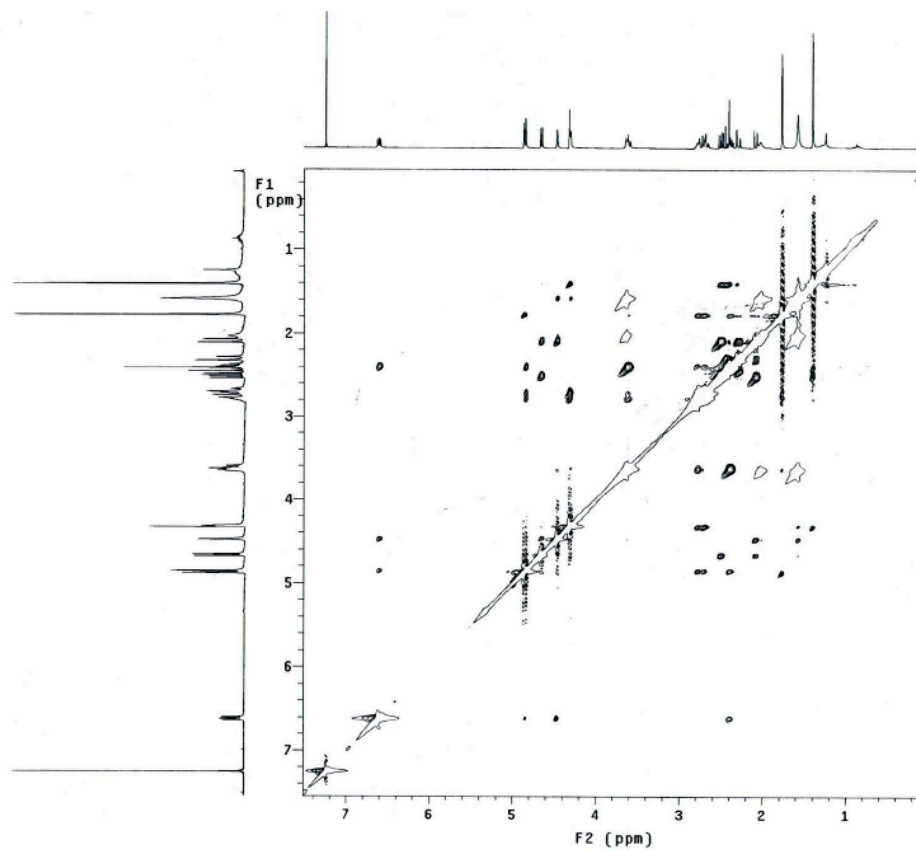

Figure S6. NOESY spectrum (400 MHz) of compound **1** in CDCl<sub>3</sub>.

---

**Mass Spectrum SmartFormula Report**

---

**Analysis Info**

Analysis Name D:\Data\2\SN1313\_000003.d  
Method broadband first signal  
Sample Name SN13-13  
Comment ESI Positive

10/23/2014 3:41:51 PM

Instrument: FT-MS solariX

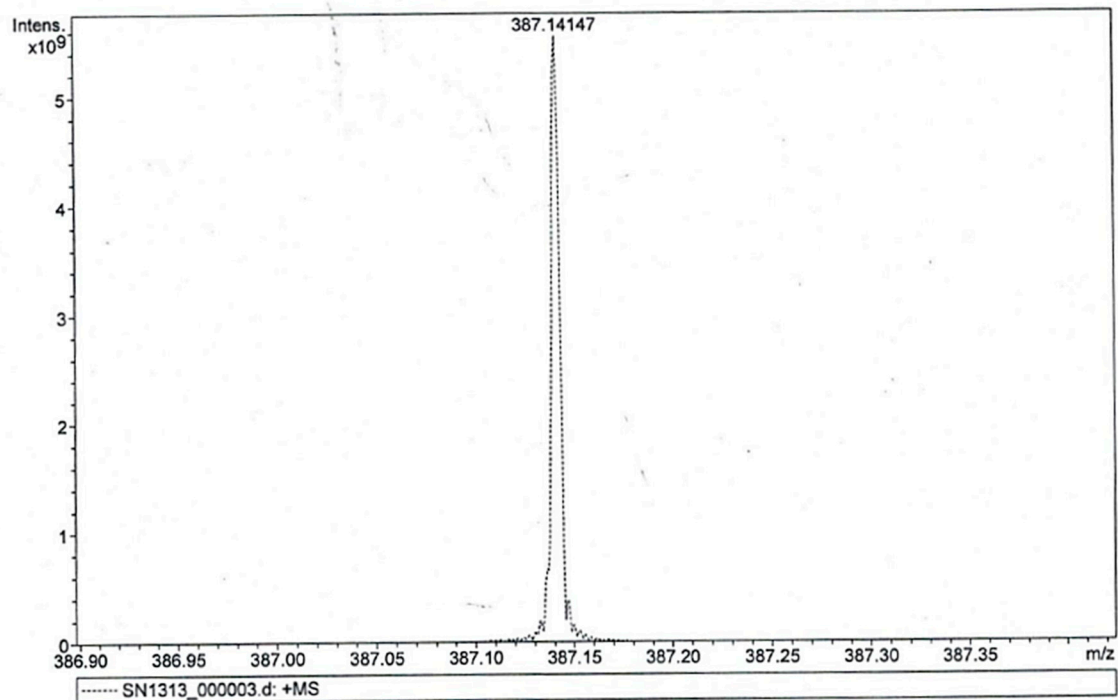

| Meas. m/z | # | Formula                                          | Score  | m/z       | err [mDa] | err [ppm] | mSigma | rdb | e <sup>-</sup> Conf | N-Rule |
|-----------|---|--------------------------------------------------|--------|-----------|-----------|-----------|--------|-----|---------------------|--------|
| 387.14147 | 1 | C <sub>19</sub> H <sub>24</sub> NaO <sub>7</sub> | 100.00 | 387.14142 | -0.05     | -0.12     | 11.2   | 7.5 | even                | ok     |

**Figure S7.** HRMS of compound 2.
